# Supplementary material
Source: PubMed Central journal article supplement (PMC4197806)

**Supplemental Figure 1. Comparison of pre- and post-HAART levels of CD4 and CD8 T-cell activation with levels in HIV-uninfected women**

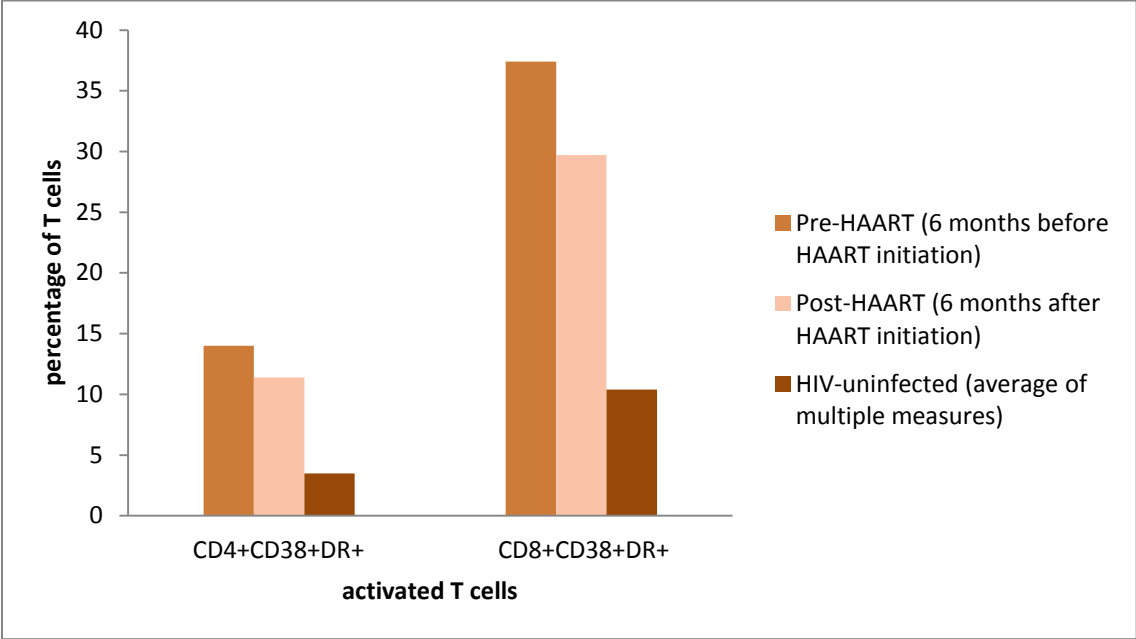

Supplement: NIHMS618893-supplement-Supplemental_Digital_Content.pdf [file NIHMS618893-supplement-Supplemental_Digital_Content.pdf]
